# Supplementary material for: Evaluation of three wheat (Triticum aestivum L.) cultivars as sensitive Cd biomarkers during the seedling stage
Source: PeerJ. 2020 Jan 27;8:e8478. doi: 10.7717/peerj.8478 (PMC6991135; doi:10.7717/peerj.8478)
Supplement: Supplemental Information 1 [file peerj-08-8478-s001.xlsx]

## Sheet: orginal
sample name	cultivar	conc	leaf length cm	leaf weight	root weight	CAT ENZYME mg/g.min	root activity TTC oxidativeug/g.h	soluable sugar(%)	chloraplat alfa mg/g	chloraplat beta mg/g	carotenoid mg/g	chloraplast a/b nmol/g	total length	area surface	volume	longest length	tips	bifuration	diameter
ck1	XH	0	18	0.5982	0.1924	6.45078	2676.08	1.11665	1.28036	0.208891	0.325942	6.12932	93.243	11.3064	0.2274	13.7823	24.6667	19.6667	0.595333
ck2	XH	0	14.6333	0.4856	0.1836	8.72297	2759.87	0.947368	1.02717	0.139556	0.23355	7.36025	67.9277	6.2675	1.89797	13.4664	16.3333	12.3333	0.478333
ck3	XH	0	16.9333	0.4322	0.1417	11.2716	1674.46	1.0822	1.03795	0.144568	0.274226	7.17966	50.973	5.40717	5.31457	12.5773	18.6667	15.6667	0.4435
cc5-1	XH	2.5	14.2667	0.3431	0.312	14.6641	4371.88	4.75198	1.09684	0.174125	0.297613	6.29919	31.7577	5.01113	0.114567	8.28263	12.3333	7.66667	0.734333
cc5-2	XH	2.5	12.5333	0.2905	0.1963	18.12	3330.01	4.08291	0.942982	0.127172	0.265185	7.41499	25.1763	3.80603	0.0828667	5.92957	7.33333	6.66667	0.455333
cc5-3	XH	2.5	10.7333	0.2995	0.2995	23.8266	4254.47	5.24184	1.05662	0.156609	0.300649	6.74683	33.6937	5.39597	0.396933	6.37103	13.3333	9.33333	0.719333
cc4-1	XH	5	12.6667	0.3278	0.1962	16.6326	5911.85	2.64035	0.942653	0.159744	0.238121	5.90101	22.1379	5.0085	0.1039	7.5837	6.33333	2	0.8307
cc4-2	XH	5	13.1667	0.4464	0.2411	9.83385	3964.26	2.16378	0.912428	0.130989	0.252709	6.96569	32.9092	8.14147	0.196233	9.58277	6.66667	2.5	0.7806
cc4-3	XH	5	13.6333	0.3688	0.2101	13.6309	6064.79	2.71082	0.958163	0.212804	0.268573	4.50255	27.2412	6.6993	0.160967	8.32037	7.66667	2.33333	0.8424
cc3-1	XH	10	12.6333	0.3117	0.1565	22.3884	4437.73	1.89734	1.0621	0.168764	0.26113	6.29339	23.999	4.83553	0.0918	5.09953	5	1.5	0.703
cc3-2	XH	10	11.3667	0.2947	0.1433	18.3133	2681.36	2.75177	1.17786	0.182916	0.293525	6.43935	16.426	1.68537	0.0358667	5.9812	5.33333	2	0.697
cc3-3	XH	10	12.1	0.3038	0.2075	14.5535	2520.69	2.87397	0.932122	0.180531	0.245486	5.16321	21.4074	4.10807	0.0757733	6.74523	6	1	0.688967
cc2-1	XH	20	8.53333	0.1517	0.0837	54.0324	1273.99	4.34833	0.832524	0.155864	0.222943	5.34135	12.0137	4.24487	0.0356667	4.87633	3.66667	0	0.612333
cc2-2	XH	20	9.36667	0.1988	0.1389	34.263	3530.47	4.28524	1.14276	0.200441	0.281778	5.70125	14.511	2.3949	0.0577333	5.2252	4.66667	0	0.656667
cc2-3	XH	20	9.93333	0.2109	0.1663	22.5313	5600.05	3.37316	1.02454	0.150721	0.249788	6.79757	19.1817	2.38677	0.0448	6.96363	4.66667	0	0.535333
cc1-1	XH	40	6.66667	0.1448	0.0872	55.4509	1410.12		1.22253	0.262365	0.280956	4.65964	8.34167	0.667067	0.0131667	2.9648	3.33333	0	0.701
cc1-2	XH	40	7.53333	0.1386	0.0962	54.7726	1193.32	8.13478	1.08902	0.187273	0.25508	5.81514	9.47767	1.72963	0.0321667	2.74203	3.33333	0	0.5715
cc1-3	XH	40	6.65	0.0786	0.0811		2321.6	4.65572	0.199164	0.0336155	0.0463342	5.92475	7.63833	1.45123	0.0243667	3.1849	3.66667	0	0.449
dk1	LZ	0	14.6333	0.3952	0.1083	17.6035	1813.91	0.938076	1.28696	0.219661	0.329512	5.85885	54.5987	5.3942	0.564033	12.4388	14.3333	10.6667	0.497333
dk2	LZ	0	15.4667	0.398	0.0872	15.2348	1222.85		1.30704	0.203541	0.334819	6.42153	71.1687	7.82283	0.197967	14.0831	14.3333	13.6667	0.446333
dk3	LZ	0	14.3	0.3735	0.0862	20.3654	1805.36	1.02922	1.23644	0.235166	0	5.25775	57.9977	6.75243	1.3095	14.1433	18.3333	14.3333	0.481333
cd5-1	LZ	2.5	11.7333	0.2317	0.1166	27.6357	4275.71	5.13499	1.46354	0.208615	0.408056	7.01549	21.1733	3.13077	0.0500667	9.82997	7.66667	4	0.542
cd5-2	LZ	2.5	13.7	0.2741	0.1241	13.4475	925.04	4.77083	1.1643	0.157649	0.336619	7.38542	33.0247	4.59437	0.0718333	10.9518	6.66667	2.5	0.492
cd5-3	LZ	2.5	9.43333	0.1994	0.0446	43.8931	2573.93	5.219	1.64843	0.250256	0.448588	6.587	21.7605	3.1794	0.31525	8.1869	5.5	0	0.32005
cd4-1	LZ	5	13.6333	0.2844	0.1496	19.2539	4369.52	3.86992	1.20313	0.232424	0.305835	5.17646	18.0482	3.83057	0.0843333	6.8435	6.66667	1	0.7061
cd4-2	LZ	5	10.0667	0.26	0.0987	19.798	1742.17	3.54859	1.08851	0.188321	0.279365	5.78005	23.614	4.0349	0.0661	8.43917	9.66667	4.66667	0.640133
cd4-3	LZ	5	11.5	0.2262	0.1002	32.3586	3508.78	3.27277	1.06505	0.175952	0.288849	6.05305	14.5377	2.67653	0.0504333	4.1425	5.66667	1	0.622067
cd3-1	LZ	10	9.33333	0.2212	0.0921	31.2062	3551.41	4.76624	1.08212	0.207989	0.274632	5.20279	17.1738	2.86633	0.04435	4.6476	5.33333	0	0.594
cd3-2	LZ	10	10.4333	0.1986	0.1127	24.5129	4351.22	3.53129	1.05037	0.209736	0.261737	5.00805	18.3247	3.37543	0.0636	6.08093	5	0	0.675233
cd3-3	LZ	10	9.7	0.2054	0.0901	24.792	2724.04	4.39177	1.10922	0.218044	0.272992	5.08712	14.2017	2.7775	0.0545667	4.104	5	0	0.667967
cd2-1	LZ	20											11.173	1.42307	0.0274333	3.40157	4	0	0.660333
cd2-2	LZ	20	8.03333	0.1605	0.0695	37.4919	1181.84	4.71244	1.19479	0.179728	0.294416	6.64775	9.312	1.58083	0.0286	3.0168	4.66667	0	0.532333
cd2-3	LZ	20	8.03333	0.1714	0.082	43.6531	2594.83	3.3986	1.08562	0.181108	0.28282	5.99431	17.2397	2.42627	0.0383333	4.59067	5.33333	0	0.578
cd1-1	LZ	40	4	0.0642	0.0497		1816.96	9.18167	1.13368	0.192898	0.260271	5.87708	3.8775	0.4531	0.00785	1.9282	3	0	0.673667
cd1-2	LZ	40	5.33333	0.0875	0.04	108.8	1032.84	9.21704	1.20959	0.225907	0.282697	5.35435	3.189	0.471233	0.0073	1.2778	3	0	0.5515
cd1-3	LZ	40	5.8	0.0708	0.047		1921.34	4.15892	0.699992	0.192689	0.15812	3.63276	4.57733	0.744133	0.00906667	2.0318	3	0	0.598
mk1	DF	0	14.6	0.6006	0.1528	4.88601	4919.24		0.991918	0.146422	0.269575	6.77438	43.775	7.37825	0.13365	7.7893	17.5	10	0.6205
mk2	DF	0	12.7	0.0437	0.1243	10.5315	2894.16	1.04667	1.16297	0.199498	0.306222	5.82947	45.5135	4.10915	1.2762	9.51315	20	14.5	0.5015
mk3	DF	0	13.8	0.3248		43.2337		1.27353	1.03599	0.180036	0.283178	5.75436	78.2595	9.34425	0.783	10.8656	35.5	29	0.479
cm5-1	DF	2.5	14.0667	0.4552	0.2061	11.3205	2894.36	3.87376	0.579007	0.0811238	0.167283	7.13732	61.1433	4.9456	0.2667	9.86585	20	12.3333	0.495333
cm5-2	DF	2.5	13.0667	0.4016	0.2524	12.469	2072.28		0.903678	0.118441	0.274656	7.62975	40.733	4.43623	0.0611333	9.099	14.3333	9.66667	0.458333
cm5-3	DF	2.5	12.4667	0.3572	0.1244	14.7724	2432.4	5.54935	1.05991	0.122915	0.318226	8.62311	21.8553	3.2157	0.0613333	6.40307	9.66667	3.66667	0.563333
cm4-1	DF	5	10.9333	0.268	0.1472	18.8604	1667.36	4.01945	0.98914	0.145121	0.298645	6.81595	28.1016	6.49193	0.2004	7.05813	13	8	0.787533
cm4-2	DF	5	12.8667	0.3462	0.1819	11.8624	2067.48	1.83793	0.983474	0.16988	0.294653	5.78924	36.0381	6.80167	0.177233	8.9496	13	7.66667	0.763067
cm4-3	DF	5	10.5333	0.3357	0.1794	18.841	1686.68	3.08105	0.892109	0.17974	0.306022	4.96334	38.947	8.15013	0.164733	9.69593	10	4.33333	0.737167
cm3-1	DF	10	9.93333	0.2481	0.101	18.1127	2349.22	3.38576	0.877027	0.141681	0.235291	6.19016	19.9482	4.1515	0.0854333	5.16173	8.33333	6	0.753333
cm3-2	DF	10	8.86667	0.2202	0.1463	26.26	1510.19	4.80256	0.928354	0.147675	0.267801	6.28648	21.4545	5.56103	0.122133	6.6248	7.33333	4	0.678567
cm3-3	DF	10	8.63333	0.1854	0.0986	40.05	2075.17	3.3856	0.92456	0.13279	0.253197	6.96257	18.9302	3.36487	0.0614333	6.2608	7.66667	5	0.5979
cm2-1	DF	20	7.56667	0.1707	0.0862	35.3368	2563.12	3.49923	0.904227	0.170145	0.232141	5.31445	11.3887	1.8323	0.0392667	2.8004	5.33333	0	0.678
cm2-2	DF	20	9.26667	0.1789	0.1004	27.5016	2037.96	2.27689	0.784312	0.120901	0.212519	6.48724	14.095	2.41567	0.0534333	3.22897	6.33333	2	0.692
cm2-3	DF	20	7.9	0.1107	0.0873		1314.98	3.35325	0.782216	0.160103	0.183507	4.88569	11.4593	1.41283	0.0176	2.99427	5.66667	1	0.660667
cm1-1	DF	40	3.73333	0.0699	0.0316		1824.15		0.680919	0.138707	0	4.90904	4.304	0.644133	0.00826667	1.80187	3.33333	0	0.51
cm1-2	DF	40	4.96667	0.0903	0.0427		2879.68	8.64184	0.76084	0.138707	0.137327	5.48523	4.99167	0.7516	0.0113667	1.58403	4	0	0.496333
cm1-3	DF	40	5.56667	0.0873	0.0425		2701.12	3.8206	0.714739	0.138707	0.134734	5.15287	5.76733	0.6287	0.00993333	1.65873	5	2	0.486333
